# Supplementary material
Source: PubMed Central journal article supplement (PMC3162409)
Supplement: supp_M110.206516_jbc.M110.206516-1.pdf [file supp_M110.206516_jbc.M110.206516-1.pdf]

**Table S1: TaqMan primer/probes designed for specific amplification of KCC isoforms and parameters for standard curves of copy numbers.**

| Identification     |             | Sequence                                      | Co-eff <sup>a</sup> | Slope <sup>b</sup> | E <sup>c</sup> |
|--------------------|-------------|-----------------------------------------------|---------------------|--------------------|----------------|
| KCC1               | F-primer    | 5'-GGGCTCAGTTGGGTGGAC-3'                      | 0.999               | -3.55              | 1.91           |
|                    | R-primer    | 5'-AAGAAAAGGGCTGCTCTCTCTGT-3'                 |                     |                    |                |
|                    | Probe       | <b>6FAM-TGACTCGGACGGACATG-MGB</b>             |                     |                    |                |
| KCC1b              | F-primer    | 5'-GCCAGACCTTGGCTGTCTACA-3'                   | 0.996               | -3.53              | 1.92           |
|                    | R-primer    | same as KCC1 R-primer                         |                     |                    |                |
|                    | Probe       | <b>TET-TGAGCCCCGGACATG-MGB</b>                |                     |                    |                |
| KCC3a <sup>d</sup> | F-primer    | 5'-CCCAGTGACCGGACTTCTCA-3'                    | 0.995               | -3.48              | 1.94           |
|                    | R-primer    | 5'-TCTTATGTCCGTCGTCTAACAGTTG -3'              |                     |                    |                |
|                    | Probe       | <b>6FAM-TGTCATCGAGGACCTGAG-MGB</b>            |                     |                    |                |
| KCC3b <sup>d</sup> | F-primer    | 5'GCAGACATAAAAAGCCCGGATT-3'                   | 0.993               | -3.58              | 1.90           |
|                    | R-primer    | same as KCC3a R-primer                        |                     |                    |                |
|                    | Probe       | <b>TET-CAGATGAACCAGACCTGAG-MGB</b>            |                     |                    |                |
| KCC4 <sup>e</sup>  | Inventoried | TaqMan Gene Expression Assay ID Hs00383447_m1 | 1.000               | -3.54              | 1.92           |
| mKCC1              | F-primer    | 5'- TGACAGAGATTCCTGGCATACT-3'                 | 0.998               | -3.48              | 1.94           |
|                    | R-primer    | 5'- CGGCAGCCCATGCTTCT -3'                     |                     |                    |                |
|                    | Probe       | <b>6FAM- CTCCAGGAGAACCTC -MGB</b>             |                     |                    |                |
| mKCC3              | F-primer    | 5'- ATCTCAATCCAAGGCATTCCA -3'                 | 0.998               | -3.57              | 1.91           |
|                    | R-primer    | 5'- TTGGCTGATGGCTTTTCAATT -3'                 |                     |                    |                |
|                    | Probe       | <b>6FAM- TCATTACTGAAAATCTTTG -MGB</b>         |                     |                    |                |
| mKCC4              | F-primer    | 5'- GCACAGAACAACGTTACTGAGATACA -3'            | 0.998               | -3.52              | 1.92           |
|                    | R-primer    | 5'-CACCTTTCTTTTCCACAAATGC-3'                  |                     |                    |                |
|                    | Probe       | <b>6FAM- CTCCTGGATAACCTGTGG -MGB</b>          |                     |                    |                |

<sup>a</sup> Correlation coefficient ( $R^2$ ) is listed for isoform-specific standard curves of copy numbers. Data were derived from 2-3 sets of plasmid dilution samples with 6-10 measurements.

<sup>b</sup> The slopes (S) were derived from standard curves of copy numbers as:  $Ct = S * \log_{10} [\text{Copy Number}] + n$ .

<sup>c</sup> The PCR amplification efficiency (E) for each primer/probe set was determined by  $10^{(-1/S)}$ .

<sup>d</sup> The probes for KCC3a and KCC3b crossed exon 1 and 2 junction, and R-primer were designed to cross exon 2 and 3 junction.

<sup>e</sup> The TaqMan Assay was purchased from Applied Biosystems Inc as premade reaction mix.

**Table S2. Forward and reverse primers and restriction sites used to clone myc expression tag into pcDNA3.1 expression vectors coding for full length KCC cDNAs.**

|          |                   |                                                                               |
|----------|-------------------|-------------------------------------------------------------------------------|
| mycKCC1  | mycKCC1FW         | CAGAATTCCatg <b>GAACAAAAACTCATCTCAGAAGAGGATCTG</b><br>cctcacttcaccgtggtgcc    |
|          | KCC1D-RV          | CCTCCAAGGGGGAAAGAAAAG                                                         |
|          | Restriction sites | EcoRI and BssHII.                                                             |
| mycKCC3a | mycKCC3aFW        | CAGAATTCCatg <b>GAACAAAAACTCATCTCAGAAGAGGATCTG</b><br>catcctccagaaaccaccac    |
|          | KCC3NB2-1         | TGTGTTCCCTGTGATGGAGTTC                                                        |
|          | Restriction sites | EcoRI and BamHI                                                               |
| mycKCC4  | mycKCC4FW         | CAGAATTCCatg <b>GAACAAAAACTCATCTCAGAAGAGGATCTG</b><br>cccaccaacttcaccgtggtgcc |
|          | KCC4B2            | ATCGCACTCATGGAAATGGC                                                          |
|          | Restriction sites | EcoRI and BsrGI                                                               |

Each forward primer (FW) contained the myc-tag coding sequence (bold upper case) which was in-frame linked to the KCC-specific coding sequence (lowercase). Reverse primers (RV) were also isoform-specific.
