# Supplementary material
Source: PubMed Central journal article supplement (PMC3162409)

**Supplemental Figure S1. Confirmation of the specificity of primer/probe designs for human and murine KCC isoforms.**

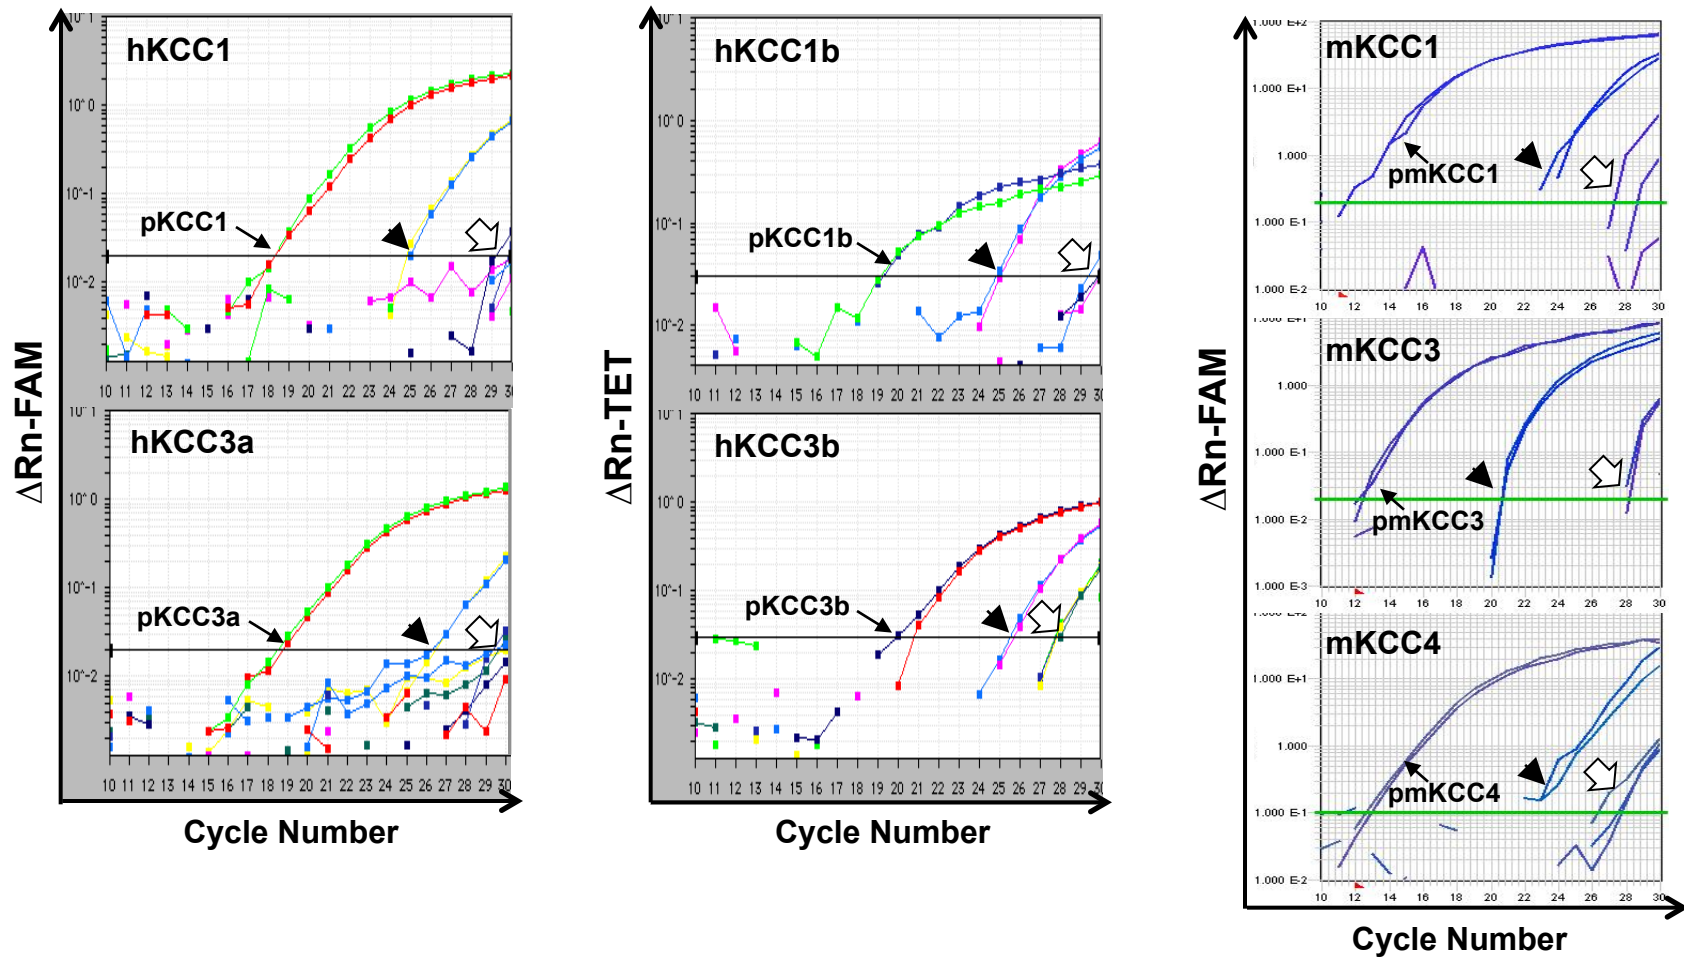

Supplement: supp_M110.206516_jbc.M110.206516-3.pdf [file supp_M110.206516_jbc.M110.206516-3.pdf]
