# Supplementary material
Source: PubMed Central journal article supplement (PMC3162409)

**Supplemental Figure S2. Validation of optimized multiplex quantification for simultaneous amplification of human KCC1 and GAPDH.**

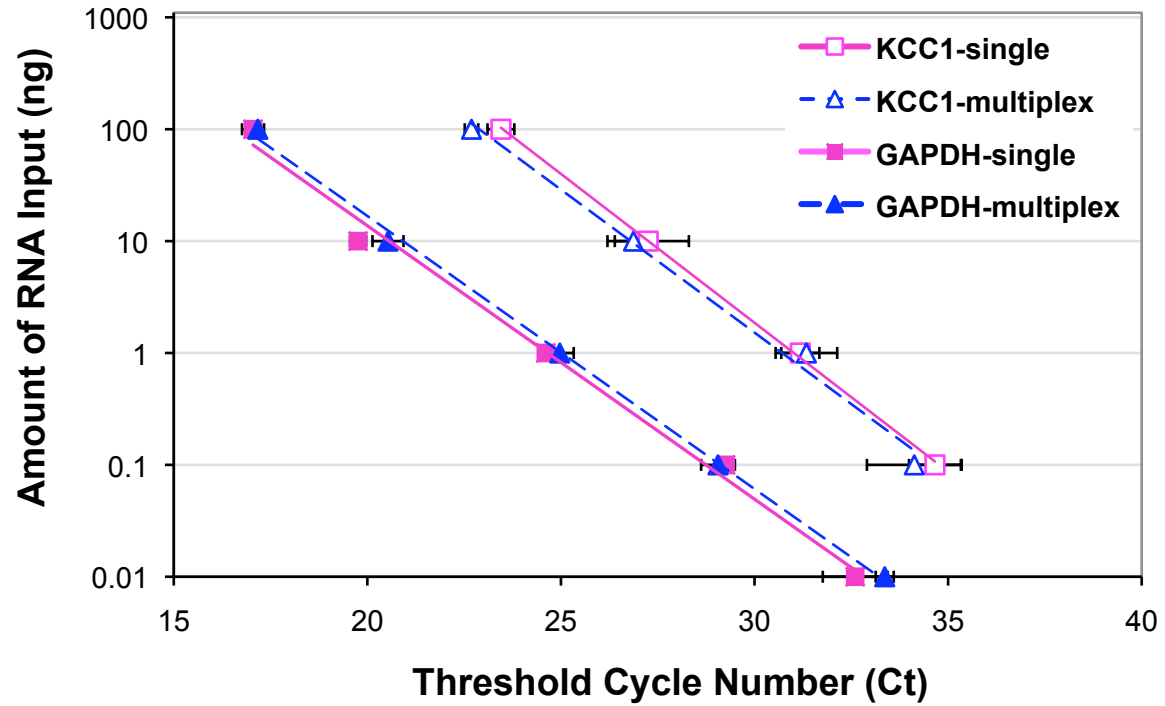

Supplement: supp_M110.206516_jbc.M110.206516-4.pdf [file supp_M110.206516_jbc.M110.206516-4.pdf]
