# Supplementary material
Source: PubMed Central journal article supplement (PMC3162409)

**Supplemental Figure S3. KCC expression during in vitro erythroid maturation.**

**A**

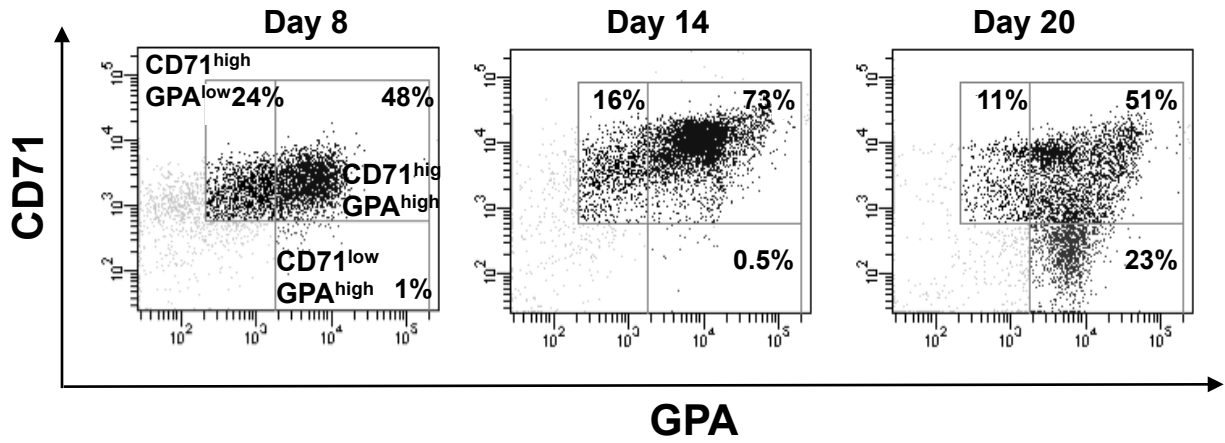

**B**

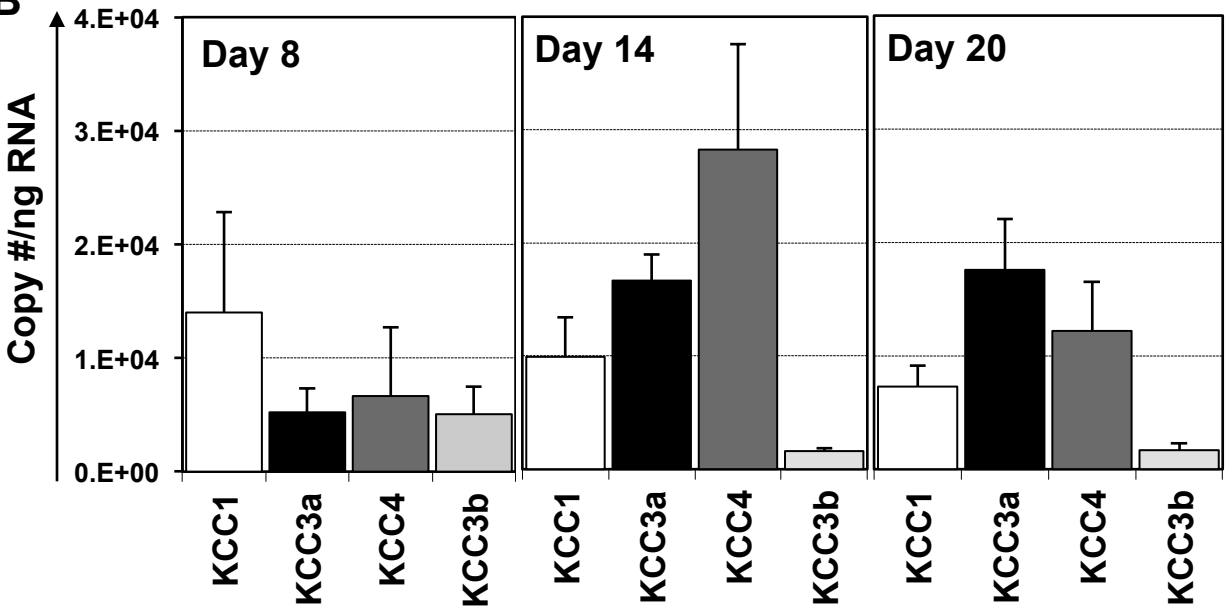

Supplement: supp_M110.206516_jbc.M110.206516-5.pdf [file supp_M110.206516_jbc.M110.206516-5.pdf]

Supplemental Figure S4. Immunoblots of HEK cells overexpressing myc-tagged KCC proteins.

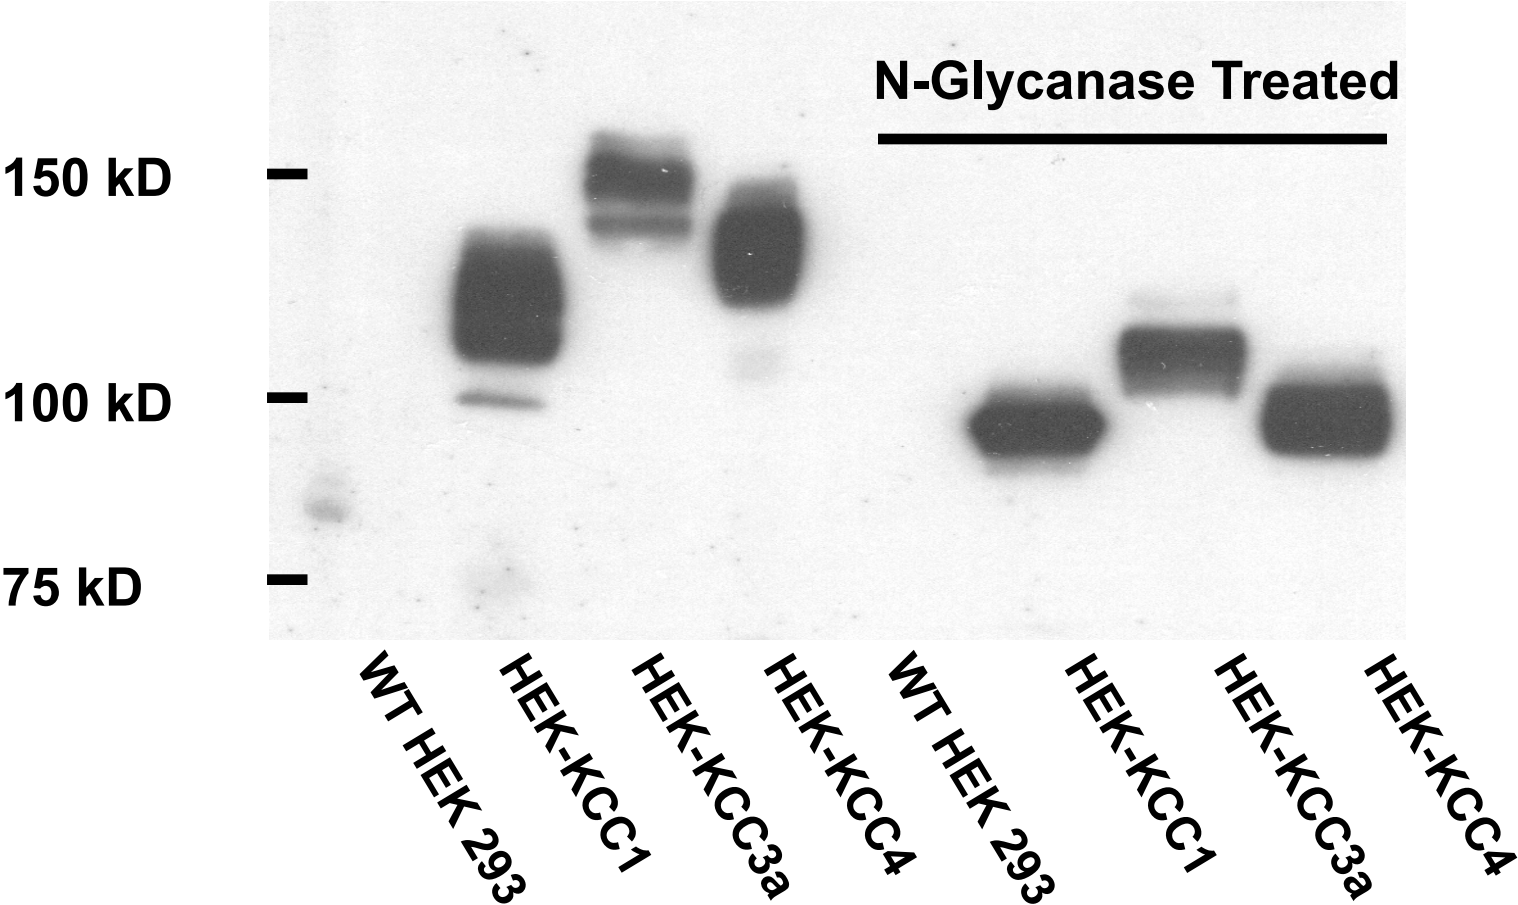

Supplement: supp_M110.206516_jbc.M110.206516-6.pdf [file supp_M110.206516_jbc.M110.206516-6.pdf]

Supplemental Figure S5. Immunofluorescence of HEK 293 cells expressing KCC proteins.

**KCC1**

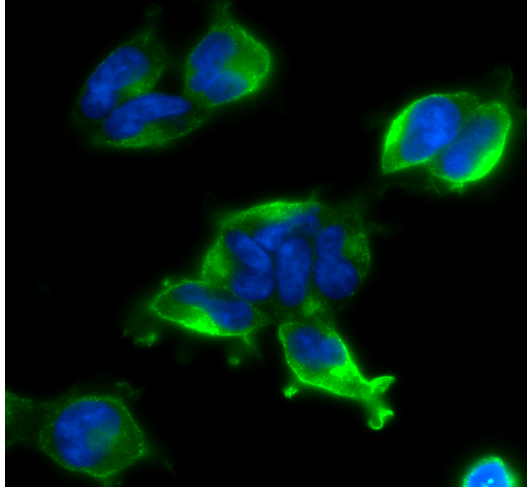

**KCC3**

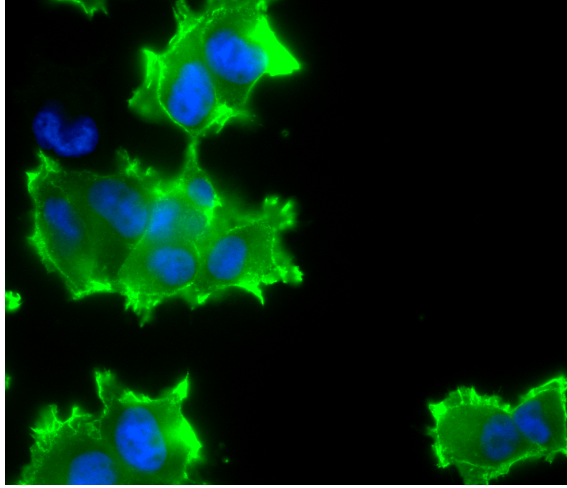

**KCC4**

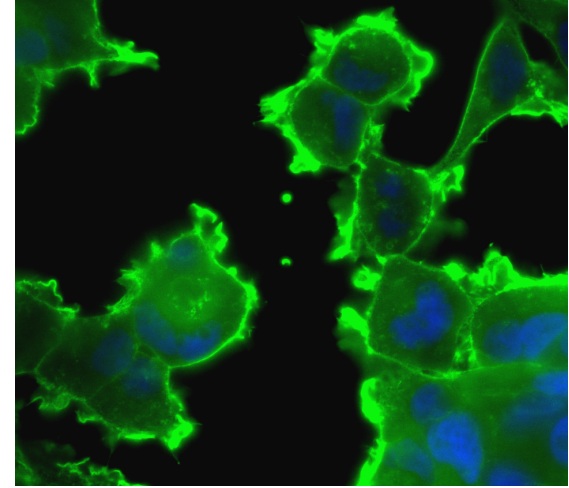

Supplement: supp_M110.206516_jbc.M110.206516-7.pdf [file supp_M110.206516_jbc.M110.206516-7.pdf]

Figure S6. Co-expression of KCC3 with KCC1 or KCC1 $\Delta$ 117.

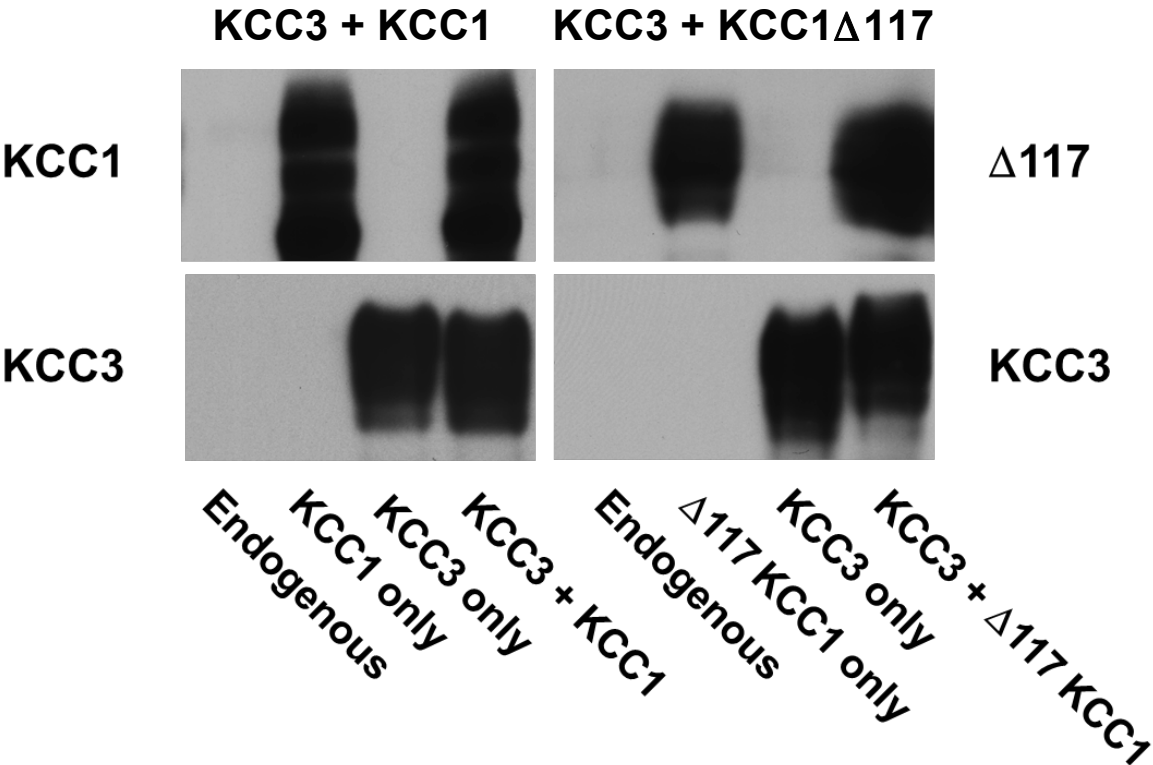

Supplement: supp_M110.206516_jbc.M110.206516-8.pdf [file supp_M110.206516_jbc.M110.206516-8.pdf]
